# Supplementary material
Source: publisher figshare collection journal article supplement (https://acs.figshare.com/ndownloader/files/31805020)
Supplement: Supplementary file 1 [file 31805020]

## **Supporting Information for**

### **Crystal structure of TCPTP unravels an allosteric regulatory role of helix $\alpha 7$ in phosphatase activity**

Jai Prakash Singh<sup>1,2,3</sup>, Meng-Jung Lin<sup>1</sup>, Shu-Fang Hsu<sup>1</sup>, Wolfgang Peti<sup>4</sup>, Cheng-Chung Lee<sup>1,\*</sup>  
and Tzu-Ching Meng<sup>1,2,5,\*</sup>

<sup>1</sup>Institute of Biological Chemistry, Academia Sinica, 128, Academia Road Sec. 2, Nankang, Taipei 115, Taiwan.

<sup>2</sup>Chemical Biology and Molecular Biophysics, Taiwan International Graduate Program, Academia Sinica, 128, Academia Road Sec. 2, Nankang, Taipei 115, Taiwan.

<sup>3</sup>Department of Chemistry, National Tsing Hua University, 101, Kuang-Fu Road, Sec 2, Hsinchu 300, Taiwan.

<sup>4</sup>Department of Molecular Biology and Biophysics, University of Connecticut Health Center, Farmington, CT 06030, USA

<sup>5</sup>Institute of Biochemical Sciences, National Taiwan University, 1 Roosevelt Road Sec. 4, Taipei 106, Taiwan.

**\*To whom correspondence should be addressed:**

**Cheng-Chung Lee**, E-mail address: chengung@gate.sinica.edu.tw

**Tzu-Ching Meng**, E-mail address: tcmeng@gate.sinica.edu.tw

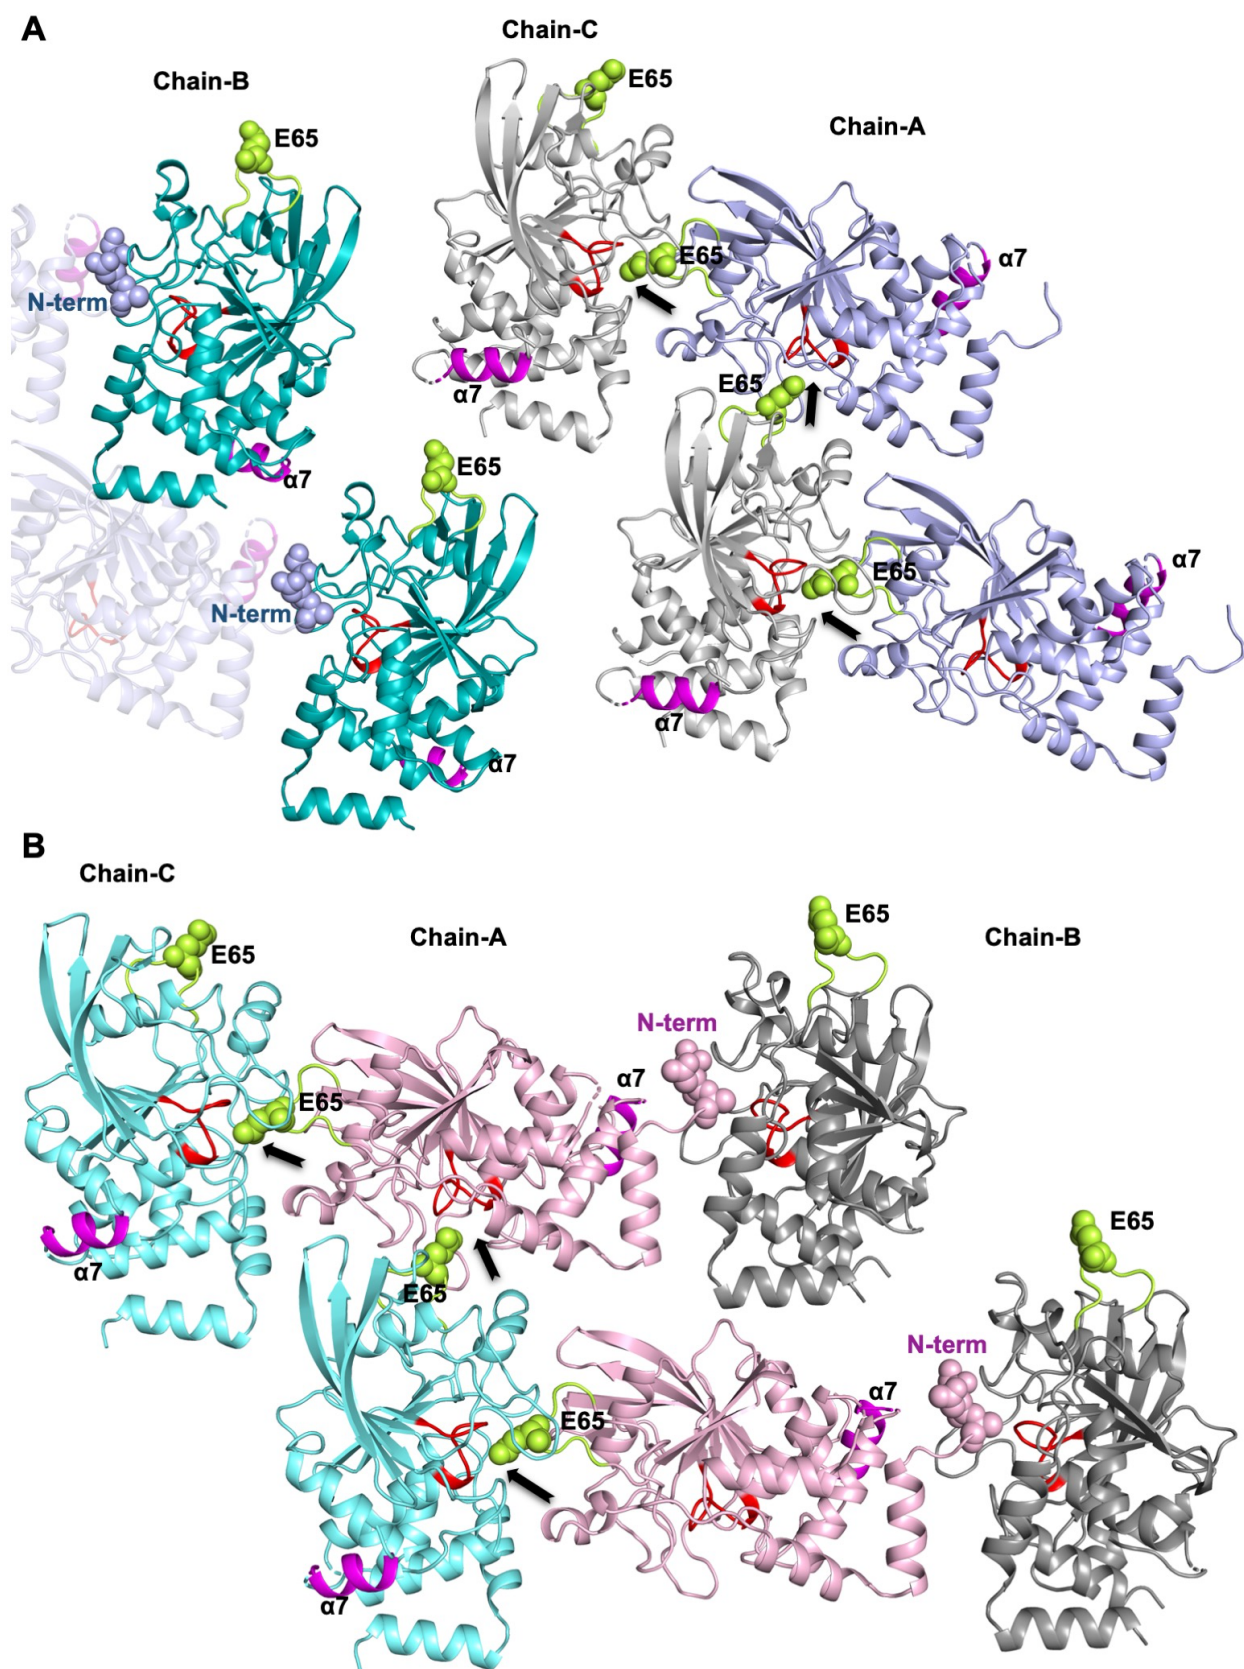

**Figure S1.** Crystal packing of TCPTP molecules in asymmetric unit illustrates multimerization of TCPTP. Chain-A and Chain-C are involved in pseudo substrate conformation. The pseudo substrate interaction at the active-site is pointed by a black arrow. Chain-B's active-site is blocked by extraneous residue of Chain-A coming from a vector. Extraneous residue is shown in sphere, which also weakly interacts with the PTP loop of Chain-B. (A) and (B) show multimerization of TCPTP in asymmetric unit of TCPTP<sub>1-314</sub> and TCPTP<sub>1-302</sub> crystal, respectively. Helix  $\alpha 7$  is missing in Chain-B of TCPTP<sub>1-302</sub> crystal. PTP loop is shown in red, Helix  $\alpha 7$  is shown in magenta, and loop L-2's E65 residue (sphere) that interacts with PTP loop is shown in lime color.

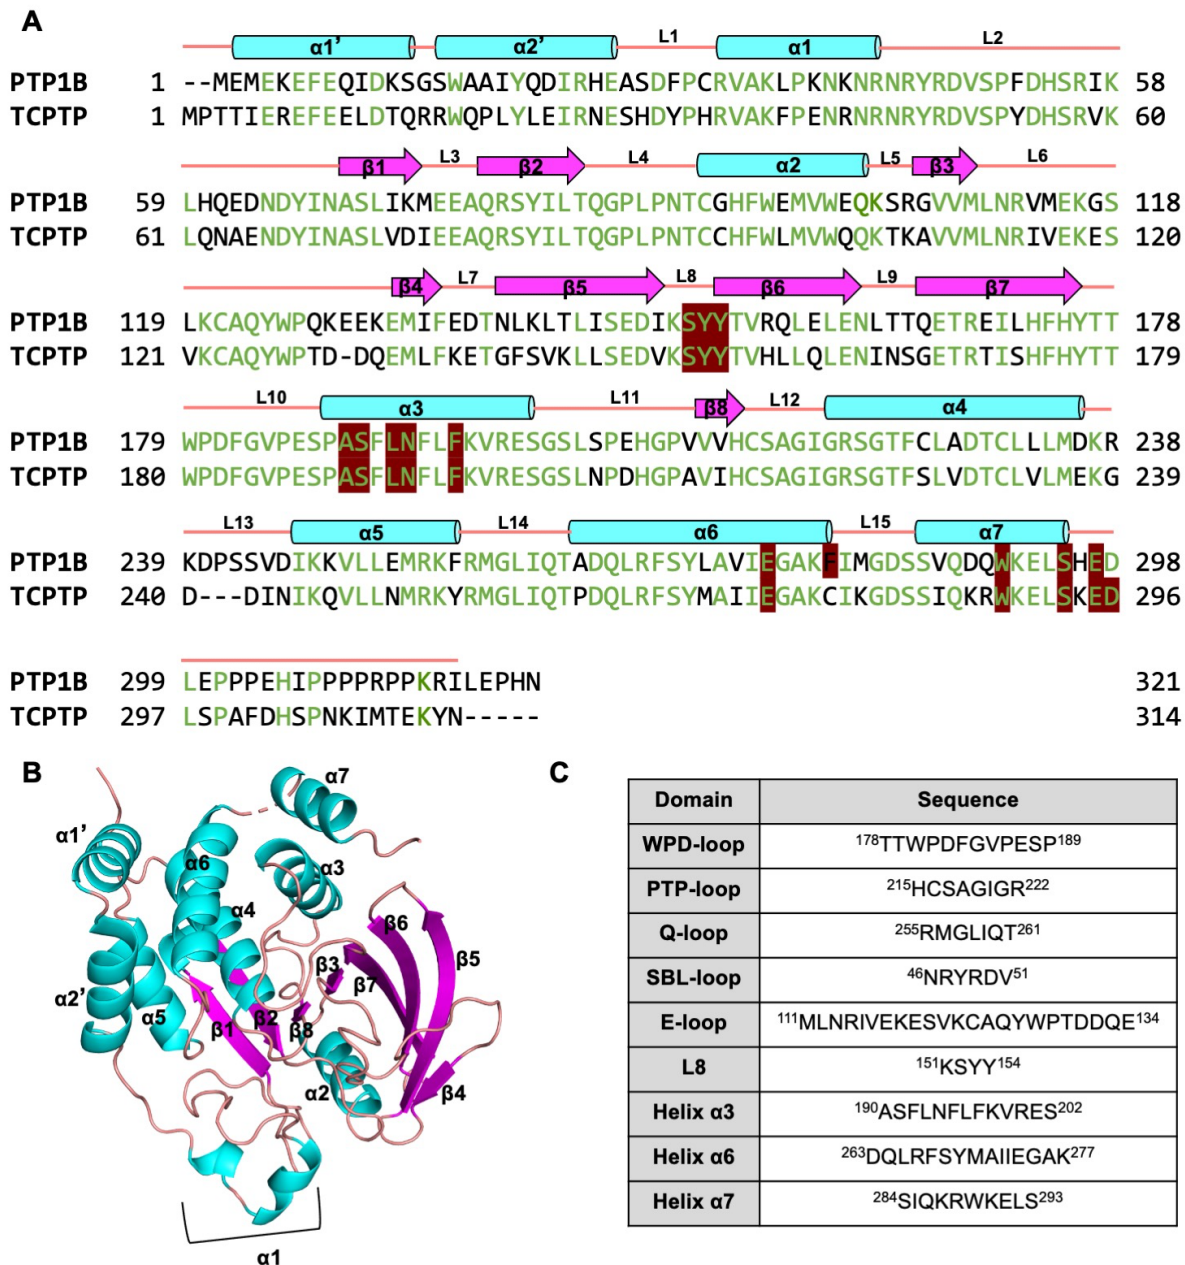

**Figure S2.** Overview of TCPTP secondary structure elements, defined by the crystal structures of TCPTP<sub>1-314</sub> and TCPTP<sub>1-302</sub>. **(A)** Amino acid sequences of TCPTP (1-314) and PTP1B (1-321) are aligned, identical residues are typed in green color, interacting residues from helix  $\alpha$ 3, 6, 7 and loop 8 (L11 in PTP1B) in TCPTP and PTP1B are highlighted with dark red. The secondary structure elements are positioned over the residues responsible for respective formation of  $\alpha$ -helices (shown in cyan) or  $\beta$ -sheets (shown in magenta), based on the TCPTP<sub>1-314</sub> and TCPTP<sub>1-302</sub> crystal

structures. **(B)** Cartoon representation and nomenclature of secondary structure elements in a 3D structure of TCPTP (derived from the TCPTP<sub>1-314</sub> crystal). **(C)** Important functional loops and helices of TCPTP denoted in this study are listed.

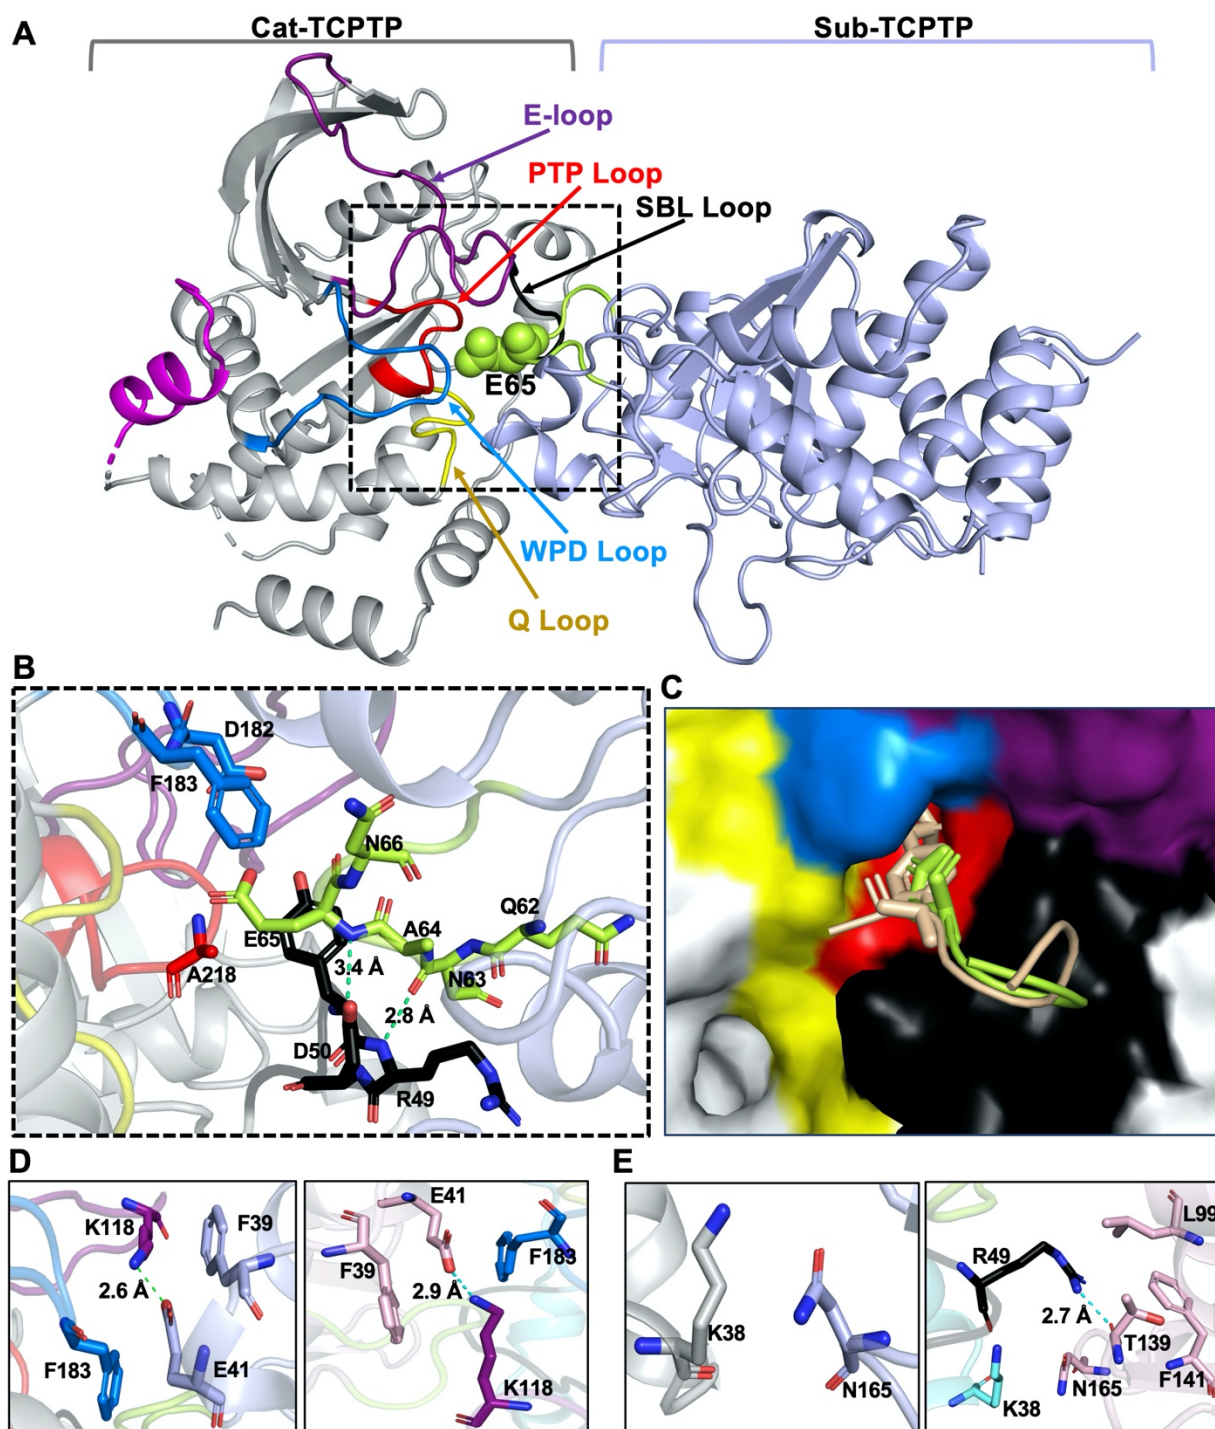

**Figure S3.** TCPTP crystal packing reveals a pseudo substrate-bound conformation, mimicking the interaction of phosphatase-substrate complex (complex composed by a phosphotyrosine peptide and a catalytic domain of PTP). (A) Structure shows interaction of TCPTP dimer in asymmetric

unit of TCPTP<sub>1-314</sub> crystal packing. One molecule offering an active-site in the interaction was named Cat-TCPTP (catalytic TCPTP), while another molecule posing loop L-2's E65 residue in interaction was named Sub-TCPTP (substrate TCPTP). Catalytically important loops are colored (PTP loop: red, WPD loop: marine blue, Q-loop: yellow, SBL loop: black and E-loop: purple). **(B)** pTyr mimicking interaction between the loop L2 residues from Sub-TCPTP and the catalytically important loops surrounding the active-site from Cat-TCPTP. Residues from Cat-TCPTP involved in the interaction are colored (PTP loop: red, WPD loop: marine blue, Q-loop: yellow, SBL loop: black and E-loop: purple). Loop 2 residues from Sub-TCPTP are shown in lime color. **(C)** Surface representation shows orientation of E65 residue (limon color) from Sub-TCPTP's interacting loop and a real substrate pTyr (wheat color, from PTP1B-pTyr peptide complex structure; PDB: 1PTU) in the active-site of TCPTP. The active-site surface is colored (PTP loop: red, WPD loop: marine blue, Q-loop: yellow, SBL loop: black and E-loop: purple). **(D)** Residues involved in intermolecular interaction at the interface formed by the WPD loop and the E-loop from Cat-TCPTP and helix-1 residues from Sub-TCPTP in crystal packing, (Left panel shows interaction at the interface of TCPTP<sub>1-314</sub> crystal while right panel is from TCPTP<sub>1-302</sub> crystal). **(E)** Residues involved in intermolecular interaction at the interface formed by helix- $\alpha$ 1 and SBL Loop from Cat-TCPTP and loop- L7, L9, helix- $\alpha$ 2 and betta sheet-5 from Sub-TCPTP in crystal packing (Left panel shows interaction at the interface of TCPTP<sub>1-314</sub> crystal, while right panel shows details of TCPTP<sub>1-302</sub> crystal).

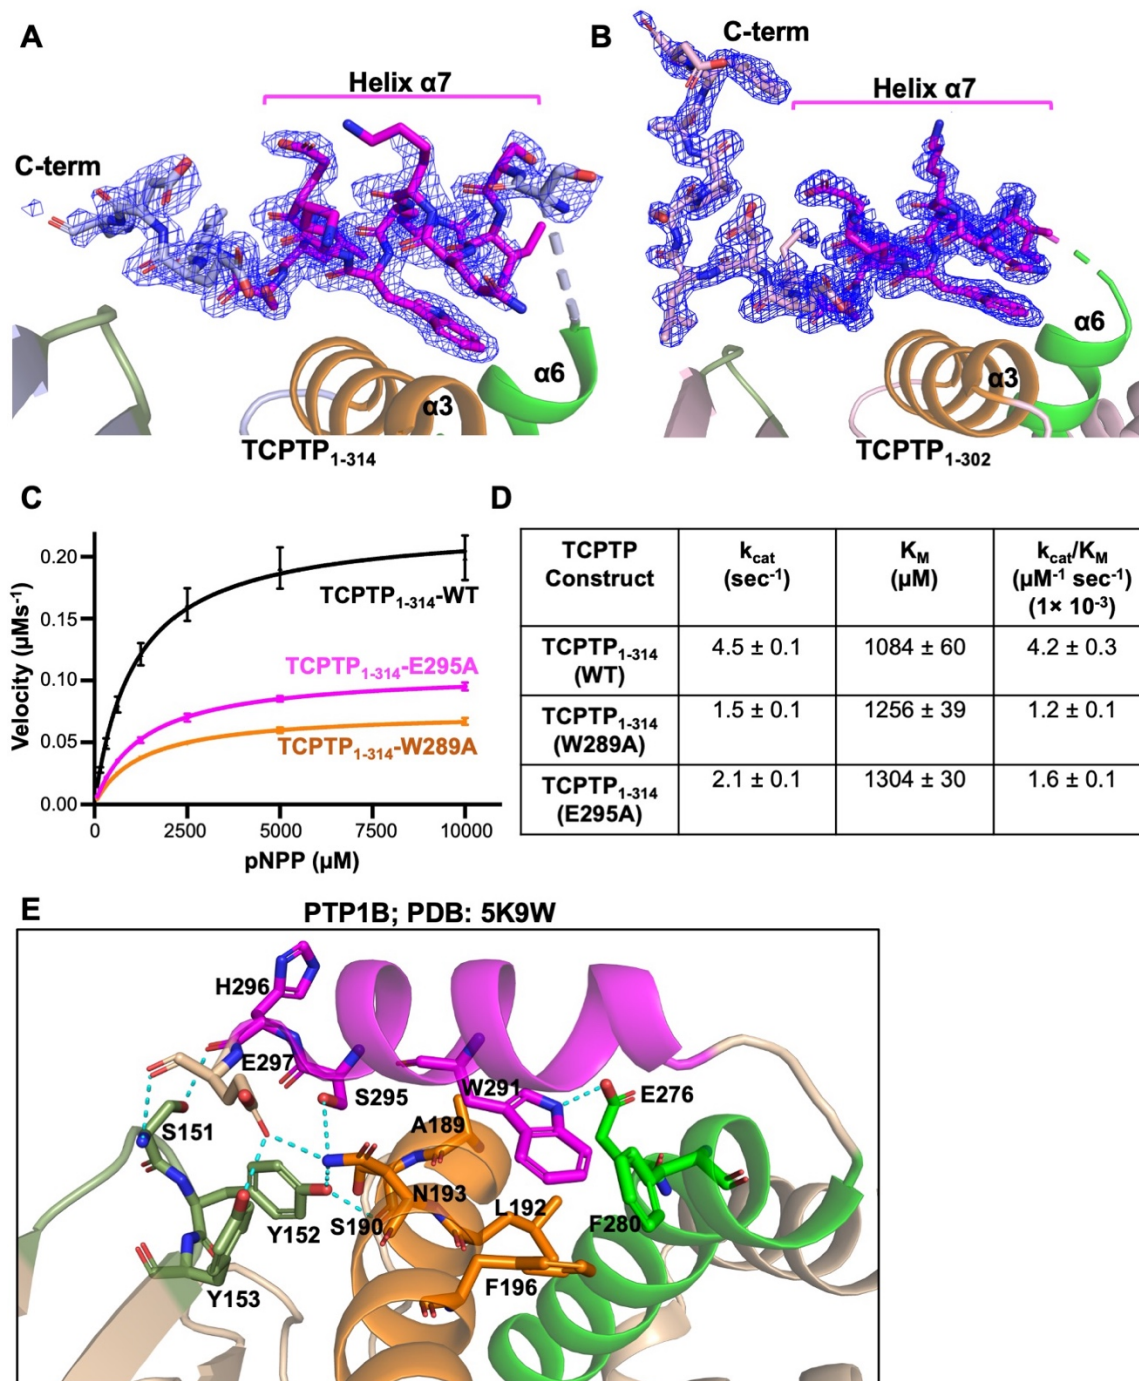

**Figure S4.** (A) Electron density map (2Fo-Fc,  $\sigma=1.0$ ) of helix  $\alpha 7$  in TCPTP<sub>1-314</sub> crystal structure (B) Electron density map (2Fo-Fc,  $\sigma=1.0$ ) of helix  $\alpha 7$  in TCPTP<sub>1-302</sub> crystal structure (C) Michaelis-Menten curves show the catalytic activity of TCPTP variants. Data are presented as means  $\pm$  SE from three independent assays of pNPP dephosphorylation. (D) Summary of kinetic

parameters determined by Michaelis-Menten kinetics. Data are presented as means  $\pm$  SE. TCPTP<sub>1-314</sub>-WT data is also shown in main figure 4B. **(E)** Intramolecular interactions of helix  $\alpha 7$  and abutting residues from its C-terminus with helix  $\alpha 3$  (Orange), helix  $\alpha 6$  (Green) and loop L-11 (Smudge green) in PTP1B crystal (PDB: 5K9W). It shows similar patterns as observed in the TCPTP crystal structures presented by the current study.

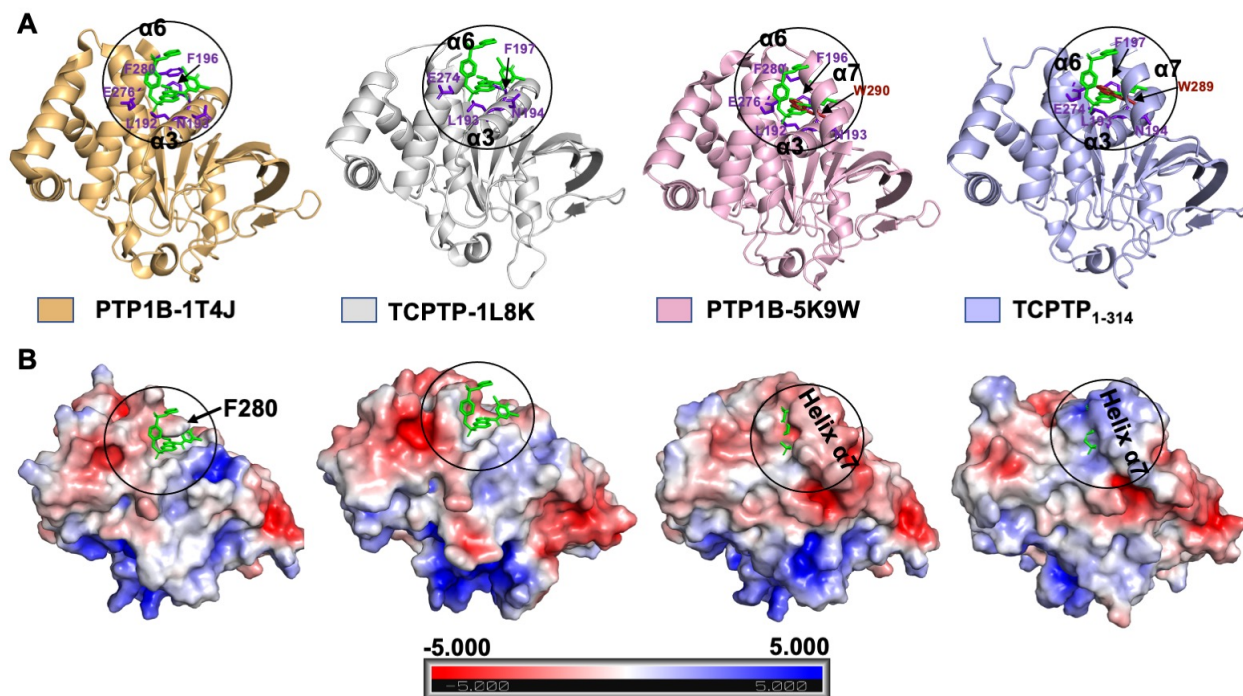

**Figure S5.** The allosteric binding sites at the interface of helix  $\alpha 3$ , -  $\alpha 6$  and -  $\alpha 7$  show distinct structural variations in TCPTP and PTP1B due to absence of phenylalanine in helix  $\alpha 6$  of TCPTP and surrounding surface charge developed by helix  $\alpha 7$  as well as abutting residues. Black circles highlight the intersection of helix  $\alpha 3$ , -  $\alpha 6$  and -  $\alpha 7$  where allosteric compound binds. The key residues from helix  $\alpha 3$ ,  $\alpha 6$  lining the binding pocket of the allosteric compound are shown as stick in purple. Helix  $\alpha 7$  residue Tryptophan, key for intramolecular interaction is shown in dark red. **(A)** Comparative visualization of allosteric inhibitor compound (green, BBR) at the allosteric binding site of TCPTP and PTP1B. ***From left to right:*** crystal structure of PTP1B without helix  $\alpha 7$  in complex with allosteric inhibitor compound (light orange; PDB:1T4J); allosteric compound overlaid in allosteric binding pocket of TCPTP without helix  $\alpha 7$  (light grey; PDB: 1L8K); allosteric compound overlaid in allosteric binding pocket of PTP1B with helix  $\alpha 7$  (light pink; PDB: 5K9W); and allosteric compound overlaid in allosteric binding pocket of TCPTP with helix  $\alpha 7$  (light blue; TCPTP<sub>1-314</sub> crystal). **(B)** Comparative surface electrostatic potential view shows that

surface charge near the allosteric compound binding site in PTP1B and TCPTP is different. TCPTP has positive potential while PTP1B has negative potential. **From left to right:** crystal structure of PTP1B without helix  $\alpha 7$  in complex with allosteric inhibitor compound (PDB: 1T4J); allosteric compound overlaid in allosteric binding pocket of TCPTP without helix  $\alpha 7$  (PDB: 1L8K); allosteric compound overlaid in allosteric binding pocket of PTP1B with helix  $\alpha 7$  (PDB: 5K9W); and allosteric compound overlaid in allosteric binding pocket of TCPTP with helix  $\alpha 7$  (TCPTP<sub>1-314</sub> crystal).
